# Supplementary material for: Nonfouling textiles with tunable antimicrobial activity based on a zwitterionic polyamine finish
Source: PubMed Central journal article supplement (PMC9062160; doi:10.1039/c8ra09975h), 2019-03-28
Supplement: RA-009-C8RA09975H-s001.pdf [file RA-009-C8RA09975H-s001.pdf]

## Supporting Information

### Nonfouling textiles with tunable antimicrobial activity based on a zwitterionic polyamine finish

Lisa M. Timma,<sup>a,b,c</sup> Laura Lewald,<sup>d</sup> Franziska Gier,<sup>d</sup> Lisa Homey,<sup>d</sup> Christian Neyer,<sup>d</sup>  
Anna Nickisch-Hartfiel,<sup>d</sup> Jochen S. Gutmann,<sup>a,b,c\*</sup> Markus Oberthür<sup>a,e\*</sup>

---

<sup>a</sup> German Textile Research Centre North-West (Deutsches Textilforschungszentrum Nord-West) gGmbH, 47798 Krefeld, Germany. E-mail: gutmann@dtmw.de

<sup>b</sup> Faculty of Chemistry, University Duisburg-Essen, 45141 Essen, Germany.

<sup>c</sup> Center for Nanointegration Duisburg-Essen (Cenide), 47057 Duisburg, Germany.

<sup>d</sup> Faculty of Chemistry, Hochschule Niederrhein, University of Applied Sciences, 47798 Krefeld, Germany.

<sup>e</sup> Current address: Department of Design, Hochschule für Angewandte Wissenschaften Hamburg, 20087 Hamburg, Germany. E-mail: markus.oberthuer@haw-hamburg.de

**Analytical data for 1-propanaminium-*N,N*-dimethyl-*N*-{3-[(1-oxo-2-propen-1-yl)amino]-propyl}-3-sulfonat, inner salt (SB1)**

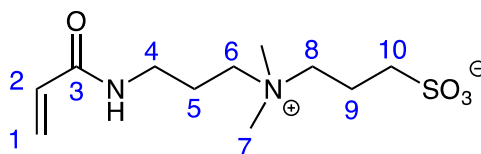

**SB1**

To a solution of *N*-[3-dimethylaminopropyl]acrylamide (**1**, 4.93 mL, 30 mmol) in acetonitrile (10 mL) was added a solution of propane-1,4-sultone (**3**, 3.66 g, 30 mmol) in acetonitrile (5 mL). The mixture was stirred at room temperature for 24 h with vigorous stirring. The solid was filtered by suction, washed with small aliquots of acetonitrile, and dried under vacuum. Sulfobetaine **SB2** (7.85 g, 95%) was obtained as a colorless, amorphous powder.

**<sup>1</sup>H NMR** (300 MHz, D<sub>2</sub>O): δ/ppm = 6.08-6.16 (m, 2H, 1-H<sub>2</sub>), 5.75 (dd, 1H, *J* = 3 and 9 Hz, 2-H), 3.41-3.45 (m, 2H, 8-H), 3.33–3.40 (m, 4H, 4-H<sub>2</sub>, 6-H<sub>2</sub>), 3.10 (s, 6H, 2 x 7-H<sub>3</sub>), 2.98 (t, 2H, *J* = 2 Hz, 10-H<sub>2</sub>), 2.08-2.14 (m, 2H, 9-H<sub>2</sub>), 2.00-2.06 (m, 2H, 5-H<sub>2</sub>).

**<sup>13</sup>C NMR** (75 MHz, D<sub>2</sub>O): δ/ppm = 169.0 (C-3), 129.9 (C-2), 127.8 (C-1), 62.4, 62.2 (C-6, C-8), 50.9 (2 x C-7), 47.2 (C-10), 36.2 (C-4), 22.5 (C-5), 18.2 (C-9).

**ESI-MS:** [M]<sup>+</sup> calcd. for C<sub>11</sub>H<sub>22</sub>N<sub>2</sub>O<sub>4</sub>S: 278.13, found: 279.1 [M]<sup>+</sup>

**Synthesis and analytical data for 1-butanaminium-*N,N*-dimethyl-*N*-{3-[(1-oxo-2-propen-1-yl)amino]-propyl}-3-sulfonat, inner salt (SB2)**

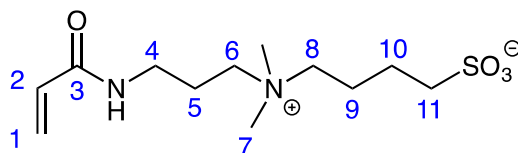

**SB2**

To a solution of *N*-[3-dimethylaminopropyl]acrylamide (**1**, 4.93 mL, 30 mmol) in acetonitrile (10 mL) was added a solution of butane-1,4-sultone (**3**, 4.69 g, 30 mmol) in acetonitrile (5 mL). The mixture was stirred at room temperature for 24 h with vigorous stirring. The solid was filtered by suction, washed with small aliquots of

acetonitrile, and dried under vacuum. Sulfobetaine **SB2** (6.58 g, 75%) was obtained as a colorless, amorphous powder.

**<sup>1</sup>H NMR** (300 MHz, D<sub>2</sub>O):  $\delta$ /ppm = 6.10-6.17 (m, 2H, 1-H<sub>2</sub>), 5.77 (dd, 1H, *J* = 3 and 9 Hz, 2-H), 3.25-3.40 (m, 6H, 4-H<sub>2</sub>, 6-H<sub>2</sub>, 8-H<sub>2</sub>), 3.05 (s, 6H, 2 x 7-H<sub>3</sub>), 2.95 (t, 2H, *J* = 2 Hz, 11-H<sub>2</sub>), 1.97-2.03 (m, 2H, 15-H<sub>2</sub>), 1.82-1.88 (m, 2H, 9-H<sub>2</sub>), 1.75-1.80 (m, 2H, 10-H<sub>2</sub>).

**<sup>13</sup>C NMR** (75 MHz, D<sub>2</sub>O):  $\delta$ /ppm = 169.0 (C-3), 129.9 (C-2), 127.8 (C-1), 63.5, 61.9 (C-6, C-8), 50.8 (2 x C-7), 50.1 (C-11), 36.2 (C-4), 22.3 (C-5), 21.0 (C-9, C-10).

**ESI-MS:** [M]<sup>+</sup> calcd. for C<sub>12</sub>H<sub>24</sub>N<sub>2</sub>O<sub>4</sub>S: 292.15, found: 293.2 [M]<sup>+</sup>

### Determination of the degree of substitution (DS) for reaction products with PVAm

The reaction products **PVAm-g-PEGMA** and **PVAm-g-SBMA** formed gels when dissolved in various deuterated solvents. Accordingly, the exact DS of these polymers could not be determined by NMR.

**PVAm-g-SB1** and **PVAm-g-SB2**, on the other hand, were easily soluble in D<sub>2</sub>O. For the determination of DS of **PVAm-g-SB1** (Figure S1), the <sup>1</sup>H NMR peaks of the methylene group of the PVAm backbone (**A-H<sub>2</sub>**) and the methylene group (**2'-H<sub>2</sub>**) formed by the Michael addition were used, as they were not overlapping with other signals. The DS is equivalent to the ratio of the two integrals multiplied by 100%.

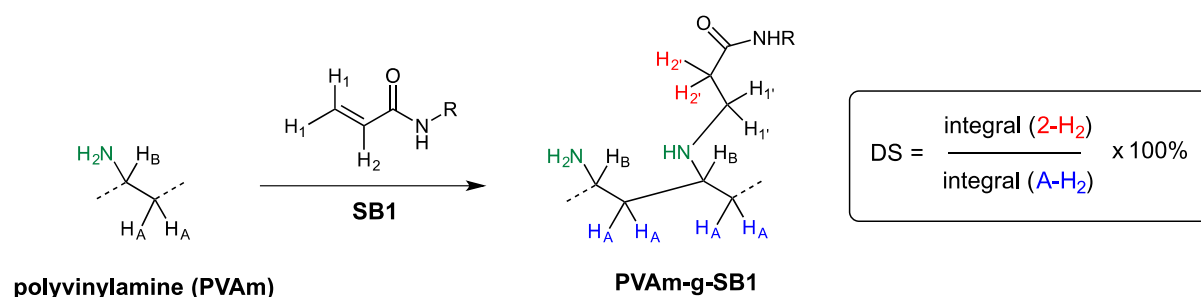

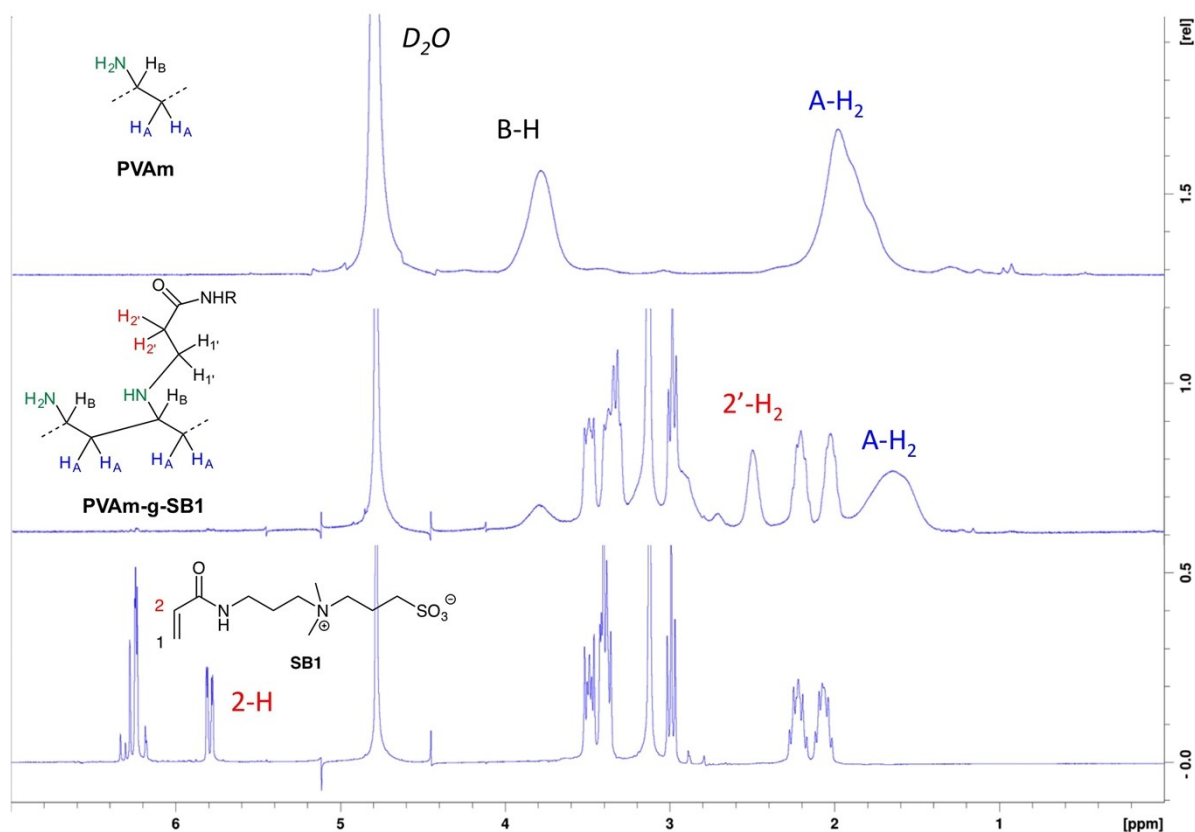

**Figure S1.** Determination of DS for **PVAm-g-SB1** and  $^1\text{H}$  NMR spectra (in  $\text{D}_2\text{O}$ , 300 MHz) of PVAm, **PVAm-g-SB1** and **SB1**.

For the determination of DS of **PVAm-g-SB2** (Figure S2), the  $^1\text{H}$  NMR peaks of the methylene group of the PVAm backbone ( $\text{A-H}_2$ ) could not be used because other signals were overlapping. Instead, the signal of the methine groups ( $\text{B-H}$ ) and the methylene group ( $2'\text{-H}_2$ ) were used. The DS is equivalent to the ratio of the two integrals multiplied by 0.5 (1/2 H atom ratio for each repeating unit) and 100%.

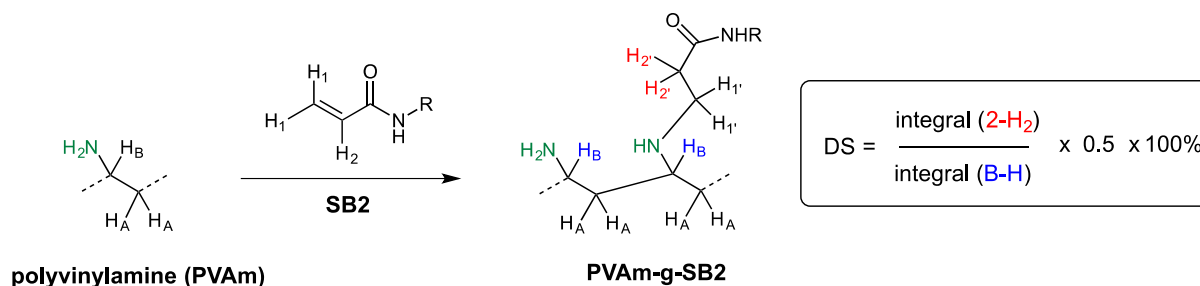

**Figure S2.** Determination of DS for **PVAm-g-SB1**

## NMR spectra of SB1, SB2 and grafted polyamines

$^1\text{H}$  NMR ( $\text{D}_2\text{O}$ , 300 MHz):

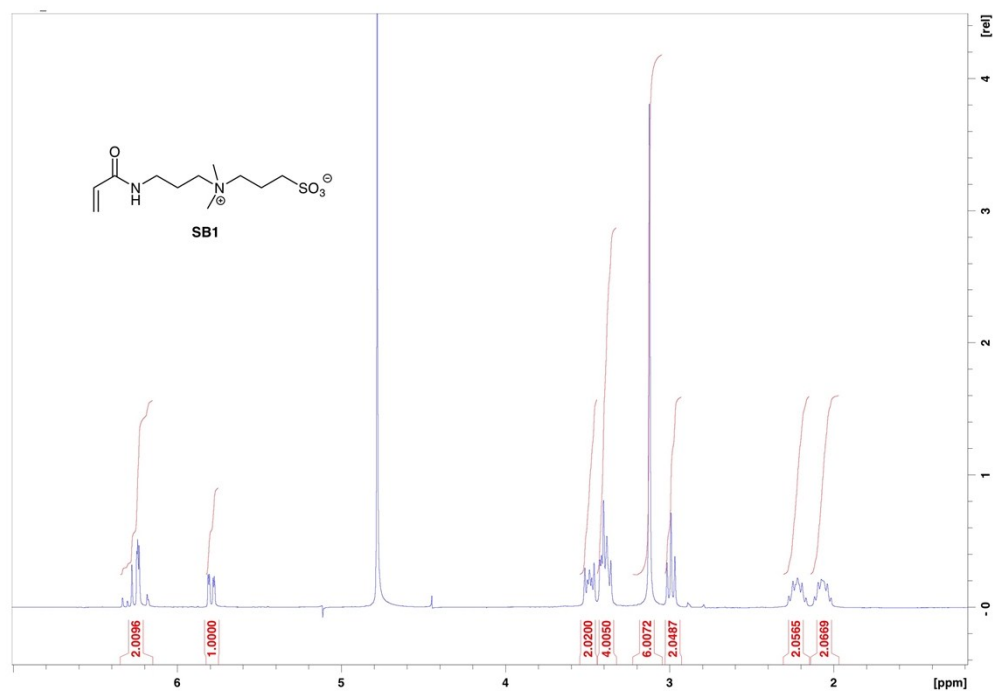

$^{13}\text{C}$  NMR ( $\text{D}_2\text{O}$ , 75 MHz):

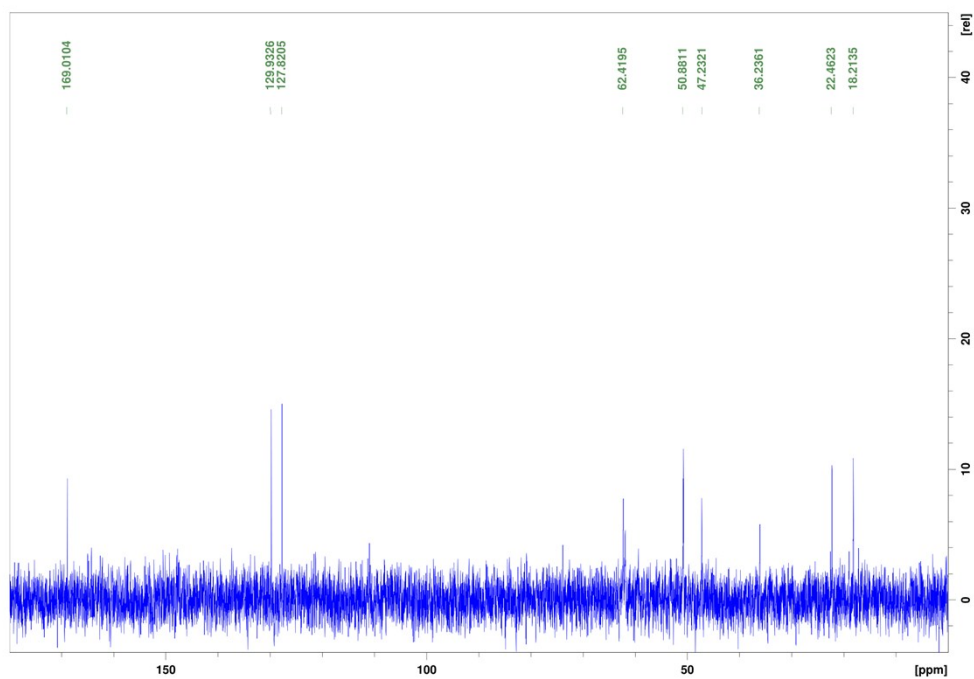

**Figure S3.**  $^1\text{H}$  and  $^{13}\text{C}$  NMR spectra of sulfobetaine **SB1**.

$^1\text{H}$  NMR ( $\text{D}_2\text{O}$ , 300 MHz):

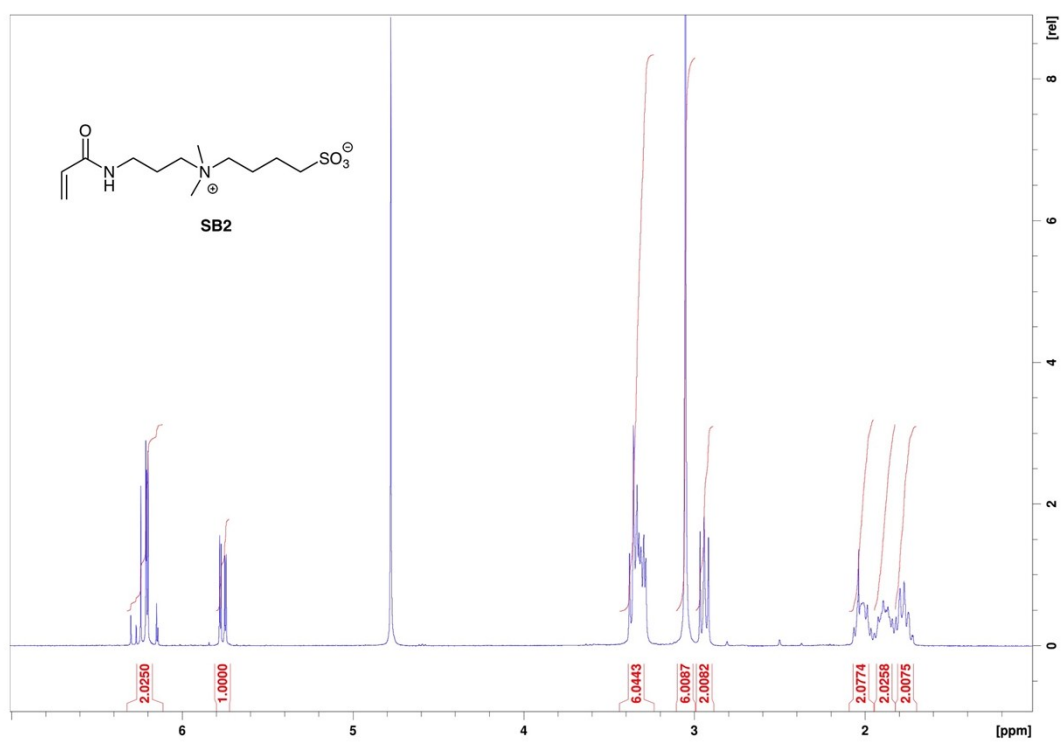

$^{13}\text{C}$  NMR ( $\text{D}_2\text{O}$ , 75 MHz):

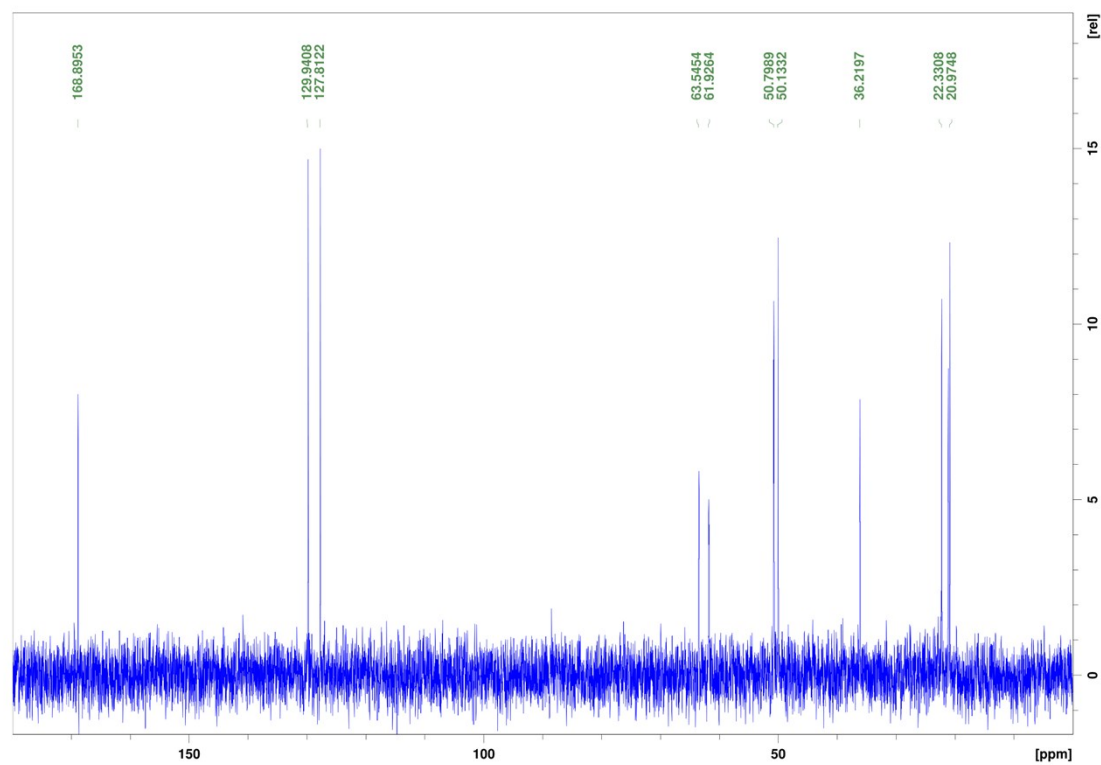

**Figure S4.**  $^1\text{H}$  and  $^{13}\text{C}$  NMR spectra of sulfobetaine **SB2**.

**PVAm-g-SB1 (DS = 22%)**

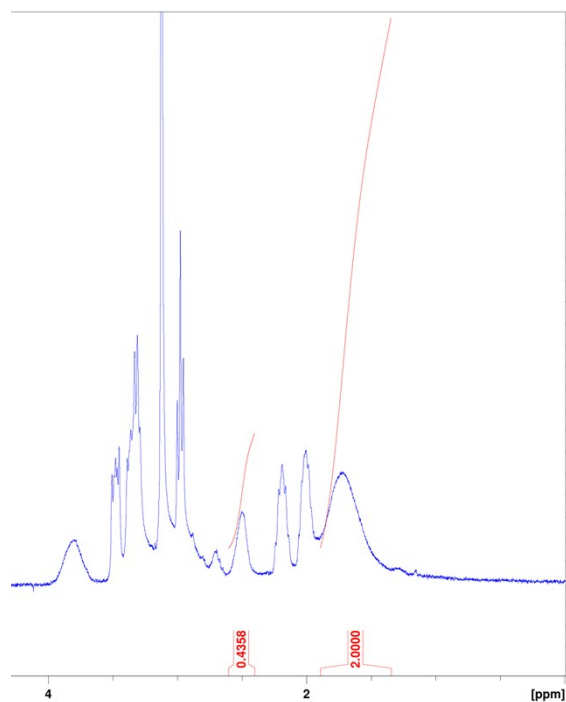

**PVAm-g-SB1 (DS = 41%)**

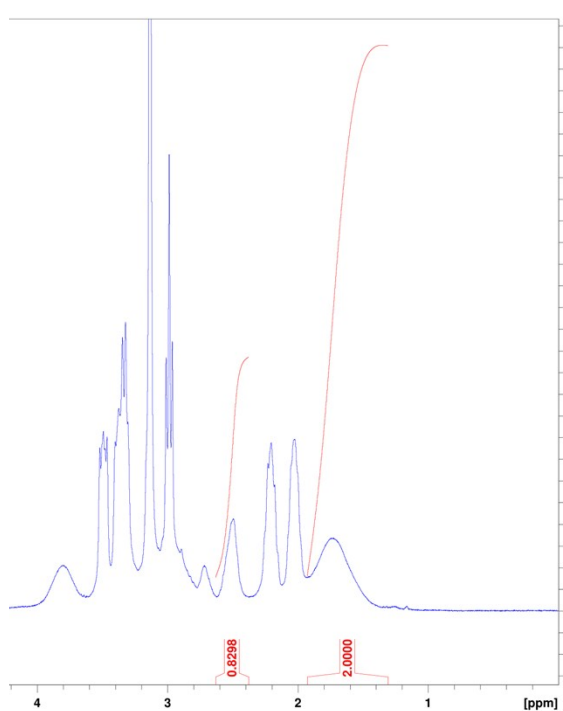

**PVAm-g-SB1 (DS = 63%)**

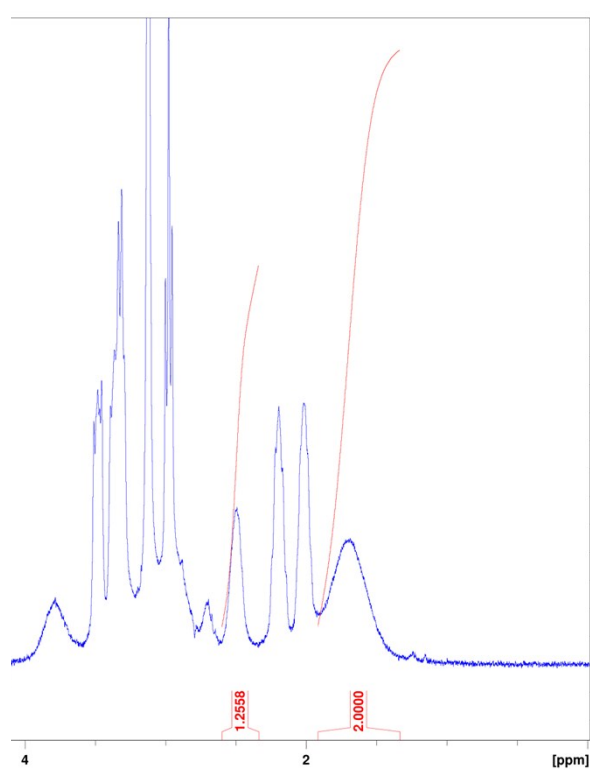

**PVAm-g-SB1 (DS = 82%)**

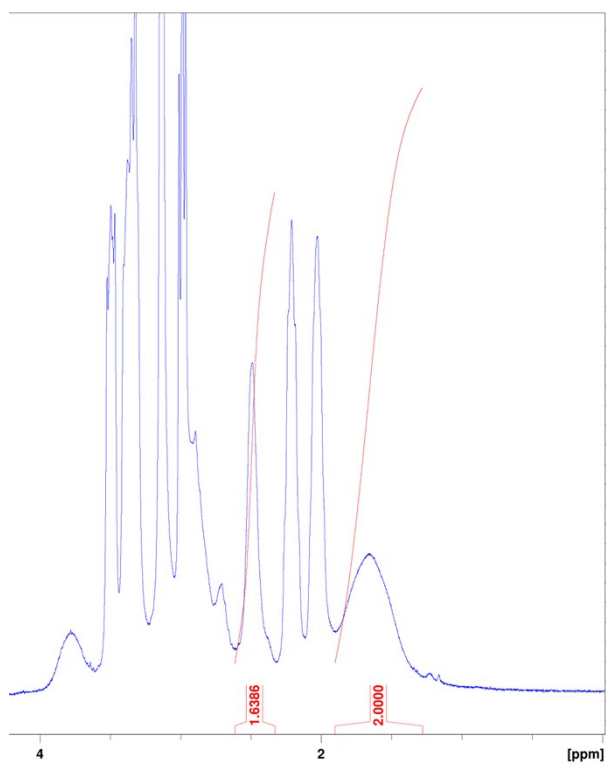

**Figure S5.** Relevant parts of the  $^1\text{H}$  NMR spectra ( $\text{D}_2\text{O}$ , 300 MHz) of **PVAm-g-SB1** used for the determination of the DS value.

**PVAm-g-SB2 (DS = 18%)**

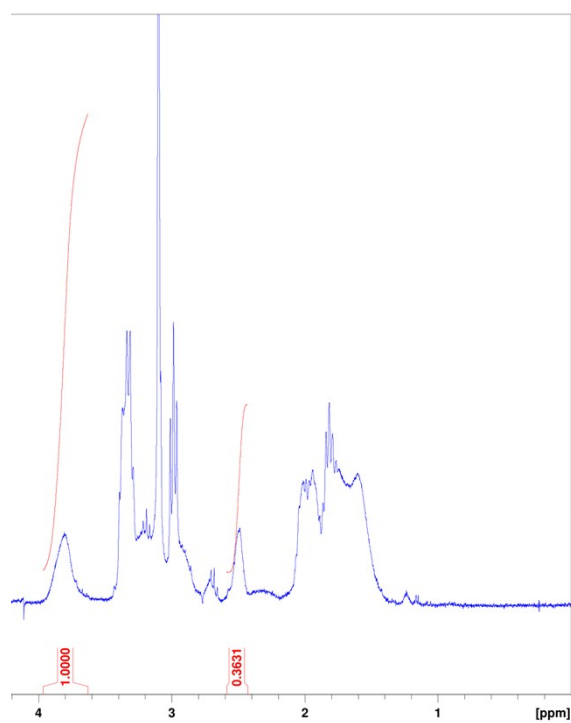

**PVAm-g-SB2 (DS = 40%)**

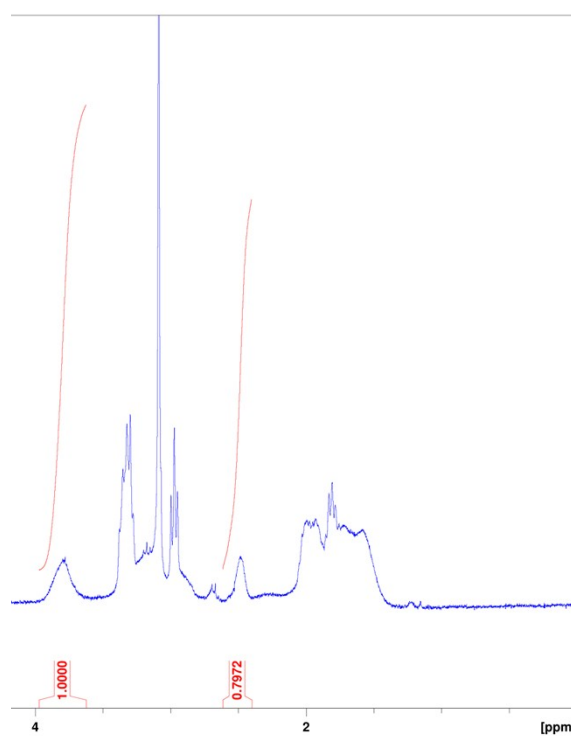

**PVAm-g-SB2 (DS = 60%)**

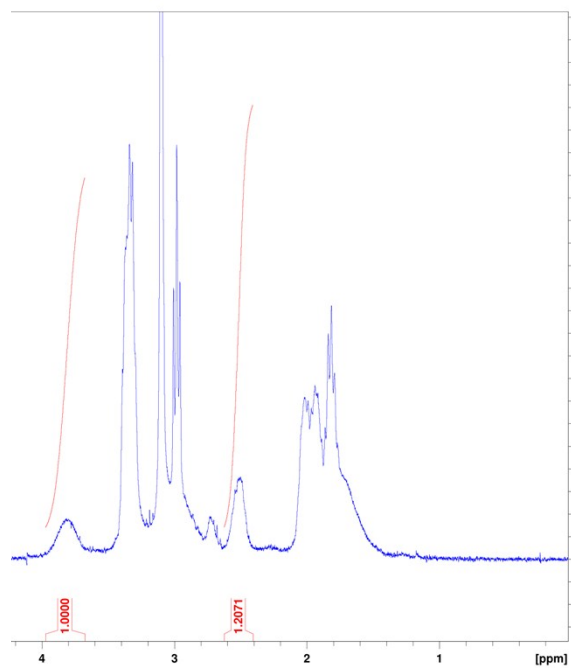

**PVAm-g-SB2 (DS = 86%)**

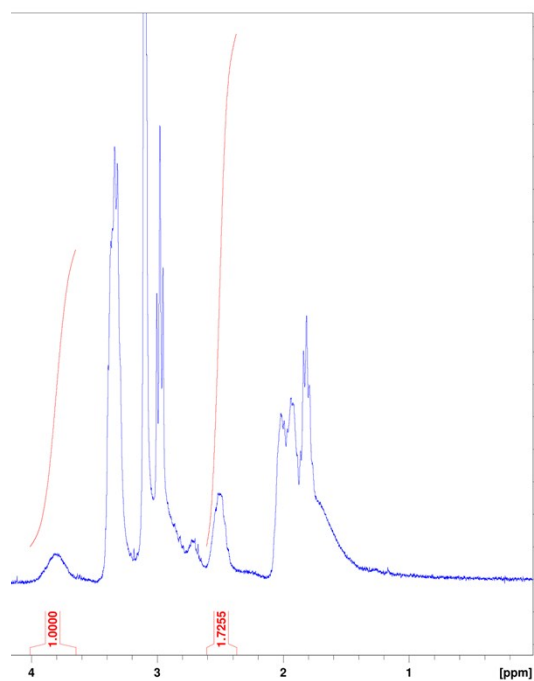

**Figure S6.** Relevant parts of the  $^1\text{H}$  NMR spectra ( $\text{D}_2\text{O}$ , 300 MHz) of PVAm-g-SB2 used for the determination of the DS value.



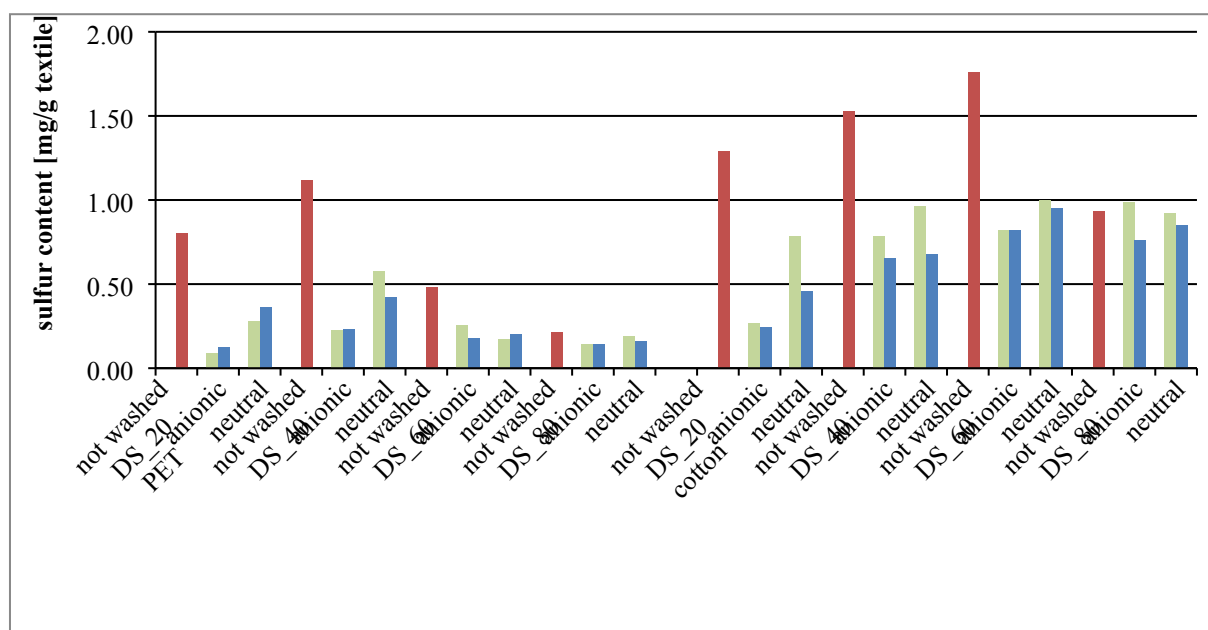

**Figure S7.** Sulfur content of PET and cotton finished with **PVAm-g-SB2** with different DS.

The sulfur content was determined by ICP-OES. The fabrics were finished with **PVAm-g-SB2** with different degrees of substitution (DS) and then used either directly after rinsing with water (not washed, red bars) or after 1 (green bars) and 5 (blue bars) wash cycles according to DIN EN ISO 105-C06 using an anionic and neutral detergent (washed).

With the ICP results, it is possible to determine the exact add-on of the polymer on the textile (see Figure 3). First of all, the quantity of sulfur ( $m$ ) has to be calculated from the obtained sulfur mass ( $m$ ):

$$n(\text{sulfur}) = \frac{m(\text{sulfur})}{M(\text{sulfur})}$$

For each DS the average molar mass ( $M\emptyset$ ) of the polymer per repeat unit was determined with the help of ChemDraw.

|       | SB2                                     | SB1                                     |
|-------|-----------------------------------------|-----------------------------------------|
| DS_20 | $M_{\emptyset} = 101.7 \text{ g / mol}$ | $M_{\emptyset} = 98.7 \text{ g / mol}$  |
| DS_40 | $M_{\emptyset} = 160.2 \text{ g / mol}$ | $M_{\emptyset} = 154.3 \text{ g / mol}$ |
| DS_60 | $M_{\emptyset} = 218.7 \text{ g / mol}$ | $M_{\emptyset} = 209.9 \text{ g / mol}$ |
| DS_80 | $M_{\emptyset} = 277.2 \text{ g / mol}$ | $M_{\emptyset} = 265.6 \text{ g / mol}$ |

With the  $M_{\emptyset}$  (polymer)  $m$  (polymer) can now be calculated by the following formula:

$$m(\text{polymer}) = \frac{n(\text{sulfur}) * M_{\emptyset}(\text{polymer})}{\frac{DS}{100}}$$

DS / 100 indicates here the ratio of sulfur-containing repeat units to non-sulfur-containing repeat units.

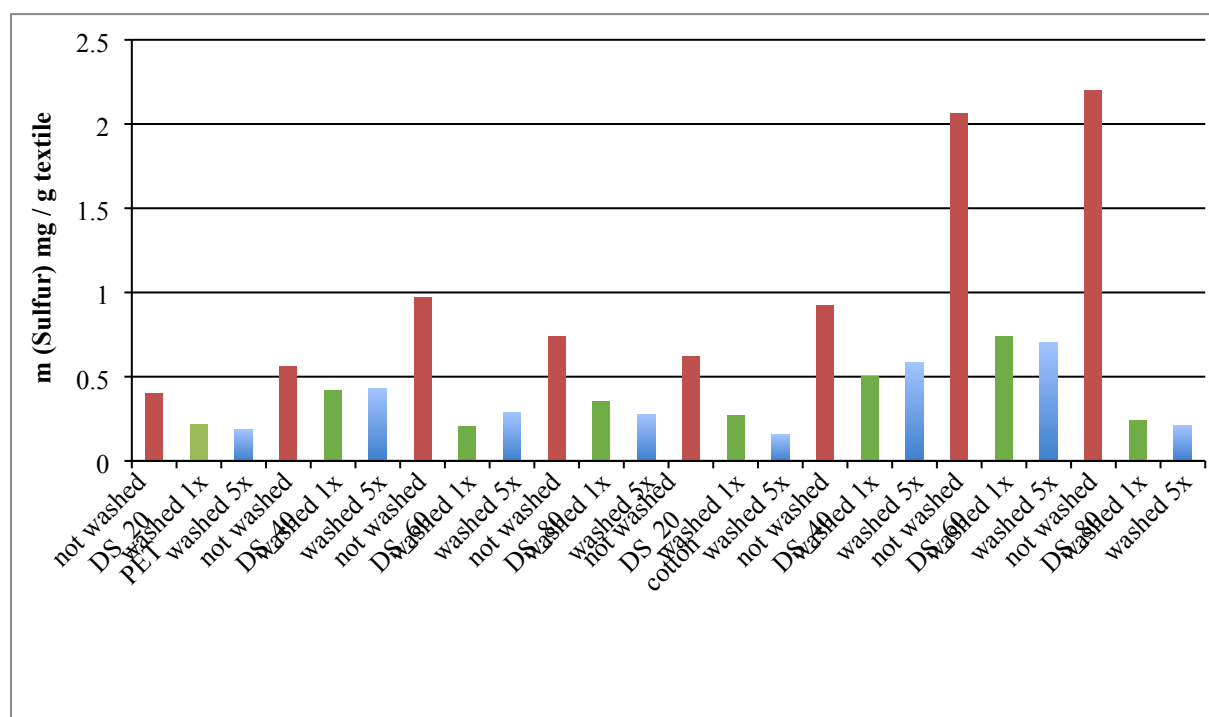

**Figure S8.** Sulfur content of PET and cotton finished with **PVAm-g-SB1** with different DS.

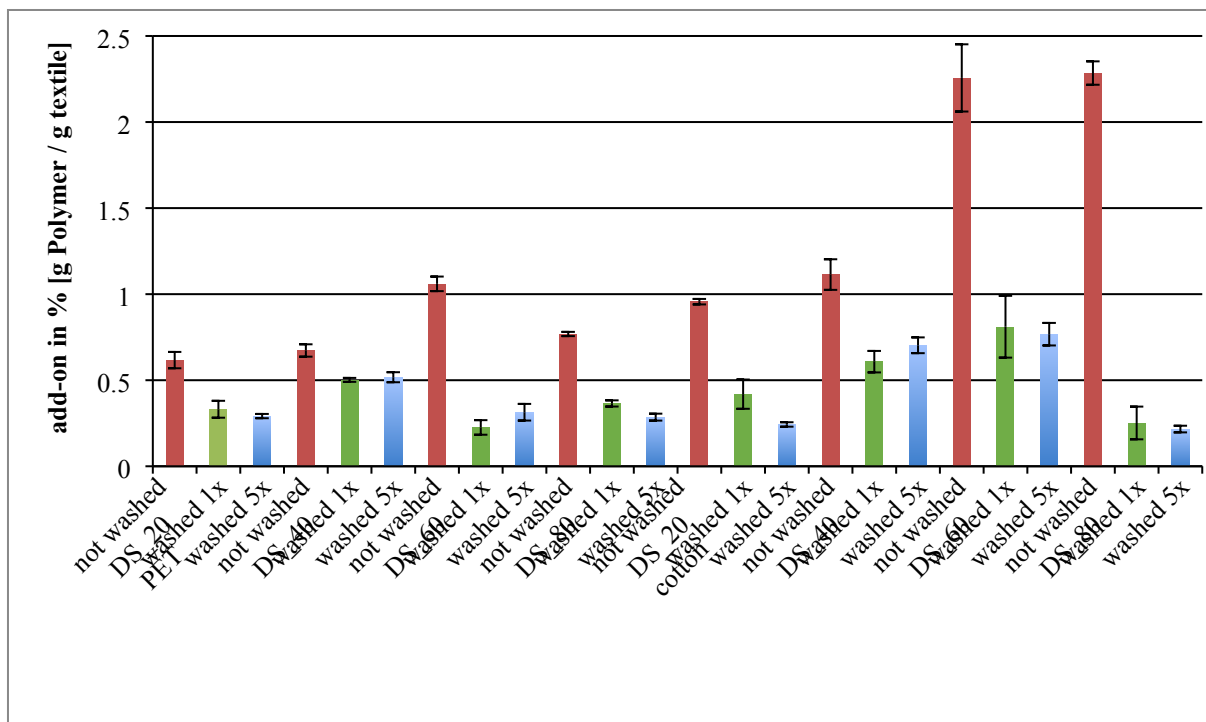

Figure S9. Add-on of PET and cotton finished with PVAm-g-SB1 with different DS.

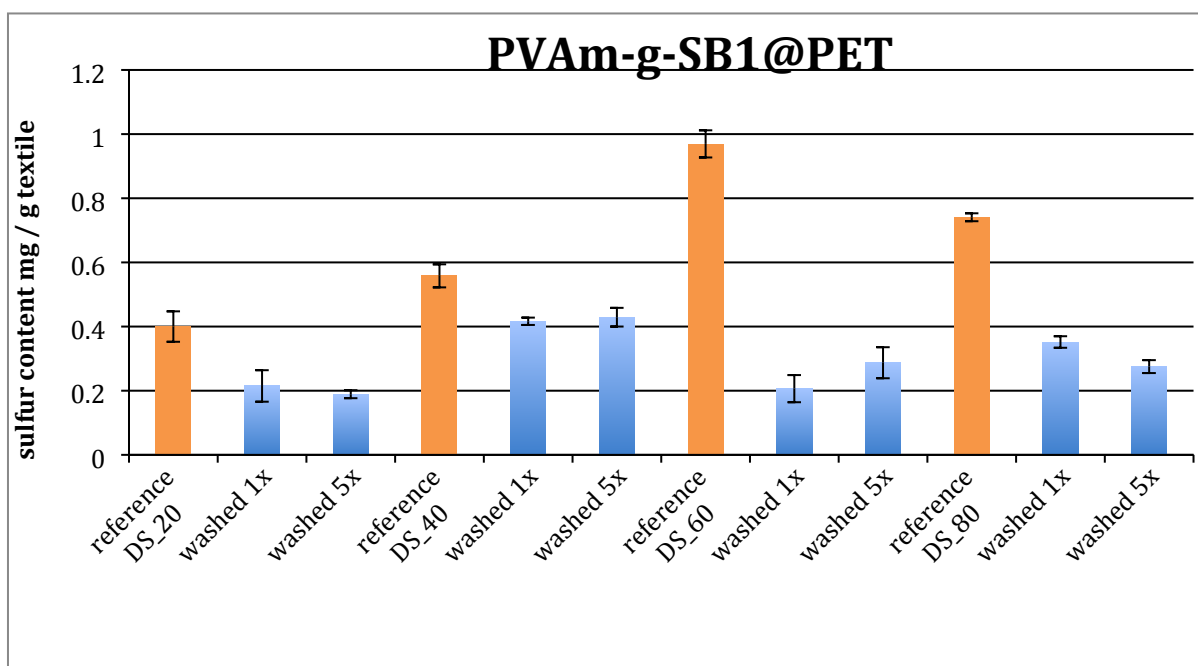

Figure S10. Sulfur content for PVAm-g-SB1 on PET after finishing, 1 and 5 wash cycles. The samples were washed according to DIN EN ISO 105-C06 using ECE detergent.

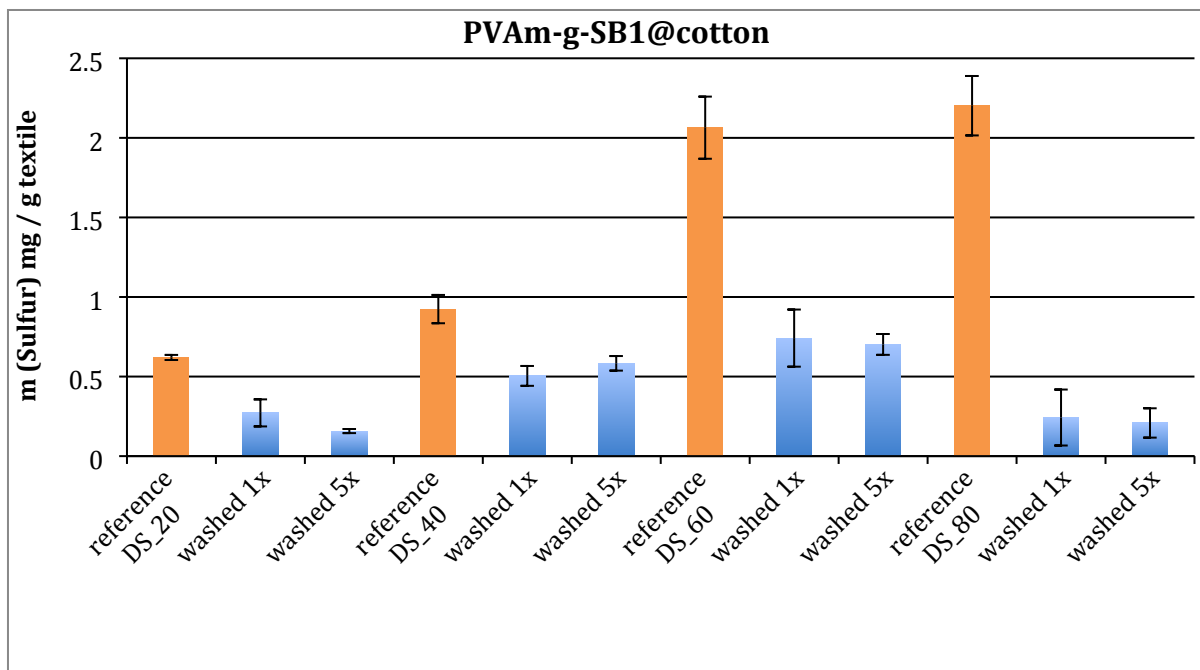

**Figure S11.** Sulfur content for **PVAm-g-SB1 on cotton** after finishing, 1 and 5 wash cycles. The samples were washed according to DIN EN ISO 105-C06 using ECE detergent.

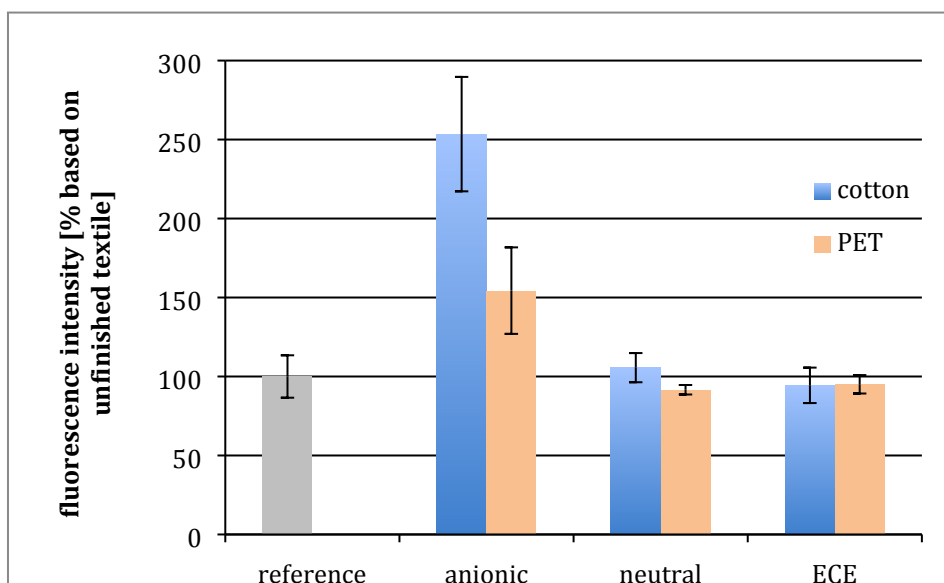

**Figure S12.** Results of the protein adhesion tests for **PET and cotton** washed with according to DIN EN ISO 105-C06 using different detergents.

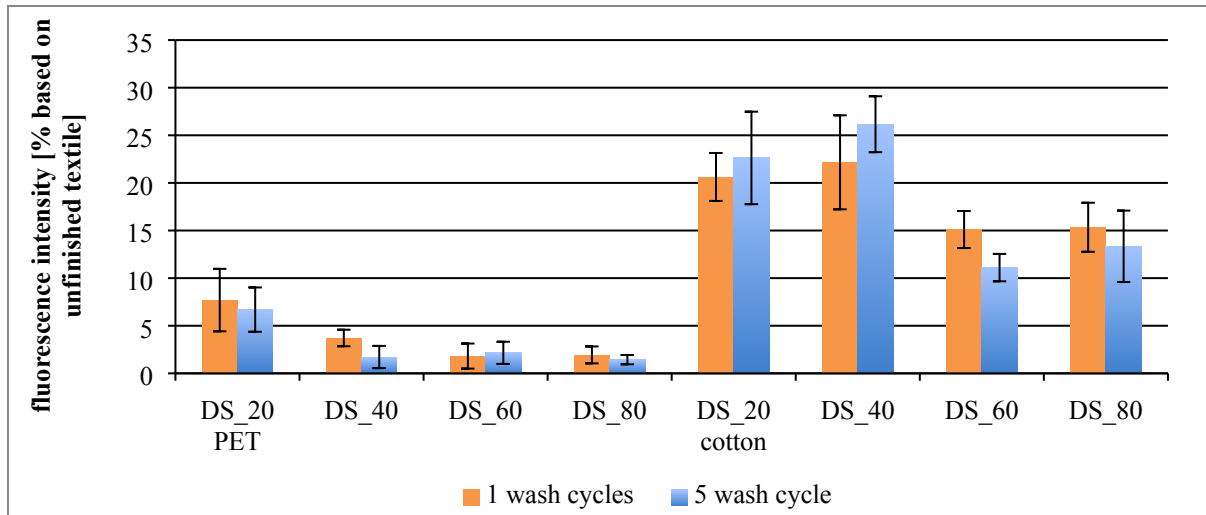

**Figure S13.** Results of the protein adhesion tests for **PVAm-g-SB2** after 1 and 5 wash cycles. The samples were washed according to DIN EN ISO 105-C06 using ECE detergent.

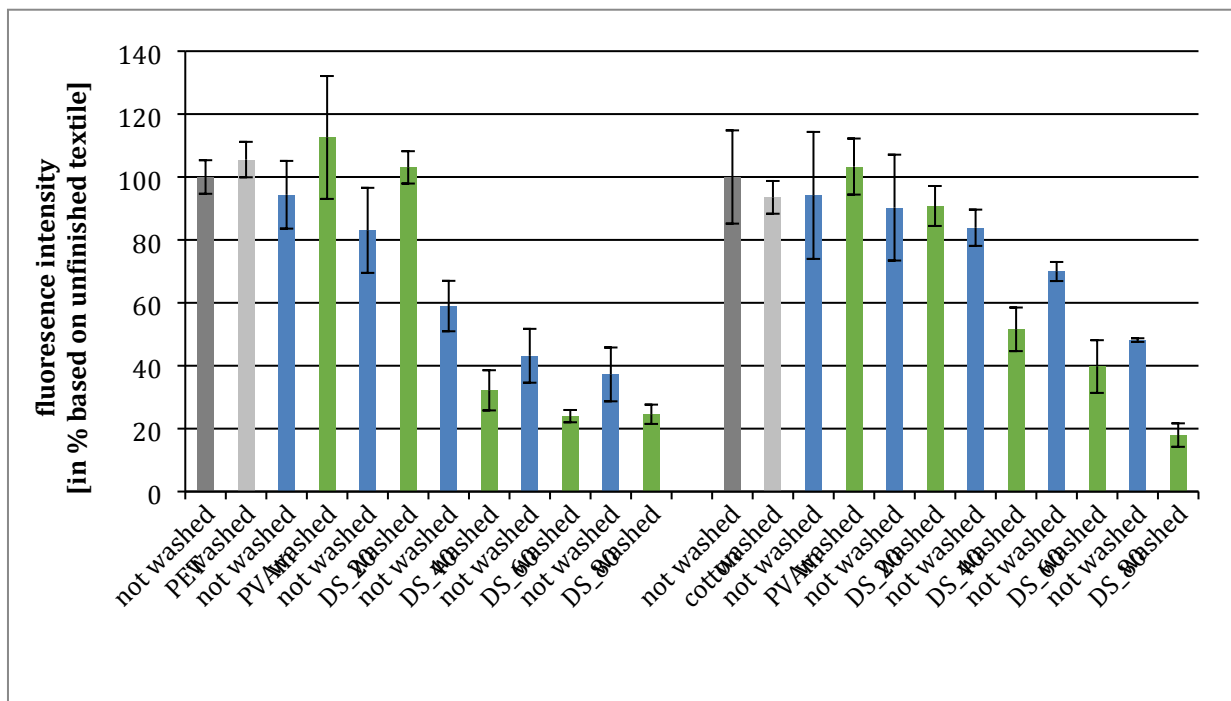

**Figure S14.** Results of the protein adhesion tests for **PVAm-g-SB1** after finishing and 5 wash cycles. The samples were washed according to DIN EN ISO 105-C06 using ECE detergent.

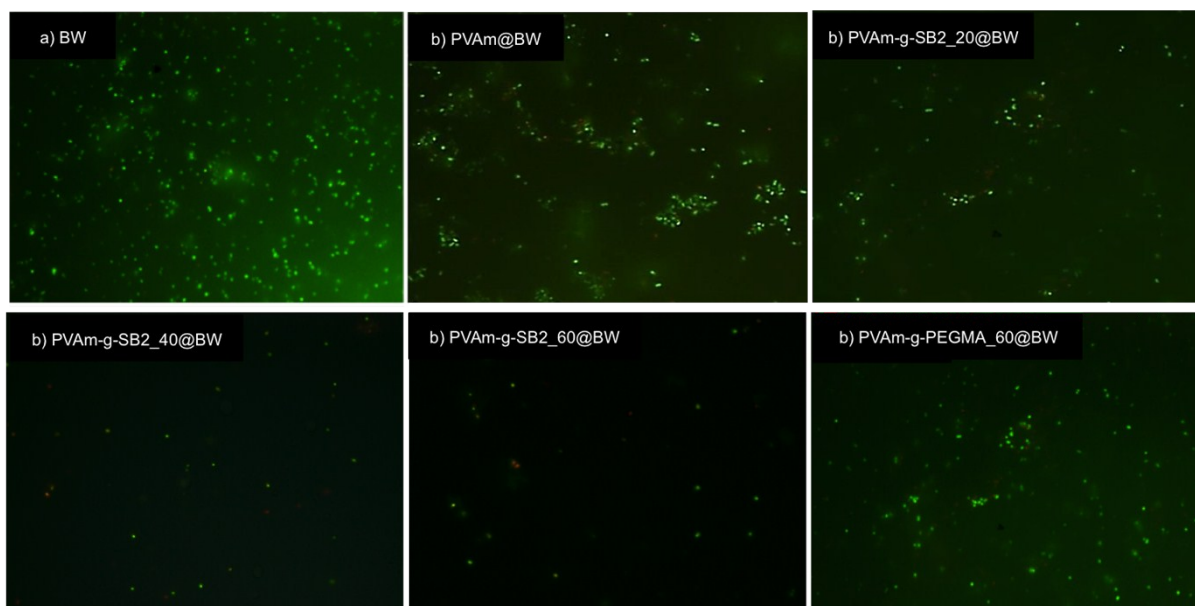

**Figure S15.** Fluorescence micrographs of different cotton fabrics after incubation with *E. coli* cell suspensions and staining (green: live, red: dead). a) untreated; b) finished with PVAm; c-e) finished with sulfobetaine-modified PVAm with DS 20, 40, and 60%, respectively; f) finished with PEG-modified polyvinylamine with DS=60%.

#### ***Determination of antimicrobial activity after washing***

***Escherichia coli pGLO:*** The *E. coli pGLO* was inoculated from the culture plate into a test tube with 5 mL LB medium (ampicillin and arabinose addition) and incubated for 24 h at 37°C and 180 rpm. Subsequently, the culture was diluted to such an extent that the CFU was about  $10^{4-5}$ . Textile pieces (d = 15 mm) were placed with sterile tweezers in a 24 well plate. 100  $\mu$ L of medium were added to completely moisten the textile and then 100  $\mu$ L of diluted preculture were added. The well plate was closed with an air-permeable film and incubated at 37°C and 120 rpm for maximum 48 h. The fluorescence intensity was read out every hour with a plate reader. In case the test was carried out for longer than 24 h, further 100  $\mu$ L of medium were added to prevent the sample from drying out

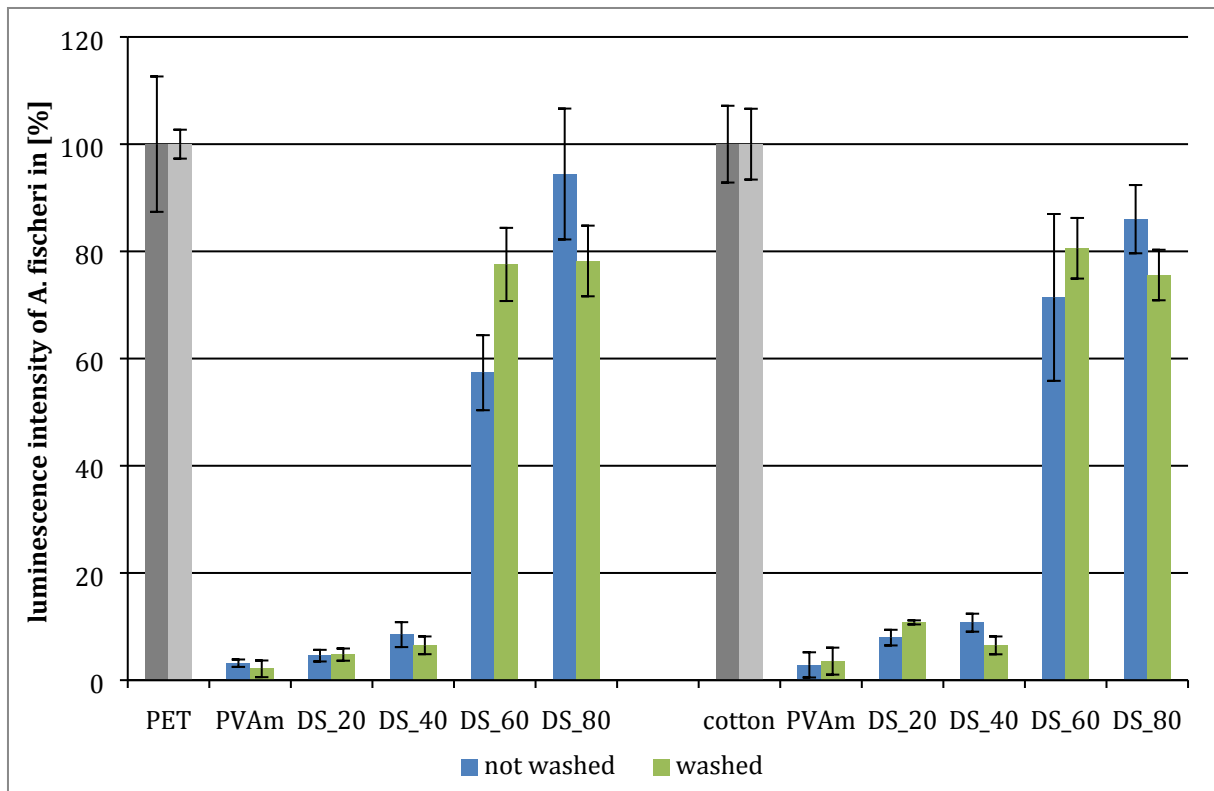

**Figure S16.** Antibacterial activity before and after 5 wash cycles against the gram-negative strain *A. fischeri* of different PET and cotton fabrics modified with **PVAm-g-SB2** with different DS.

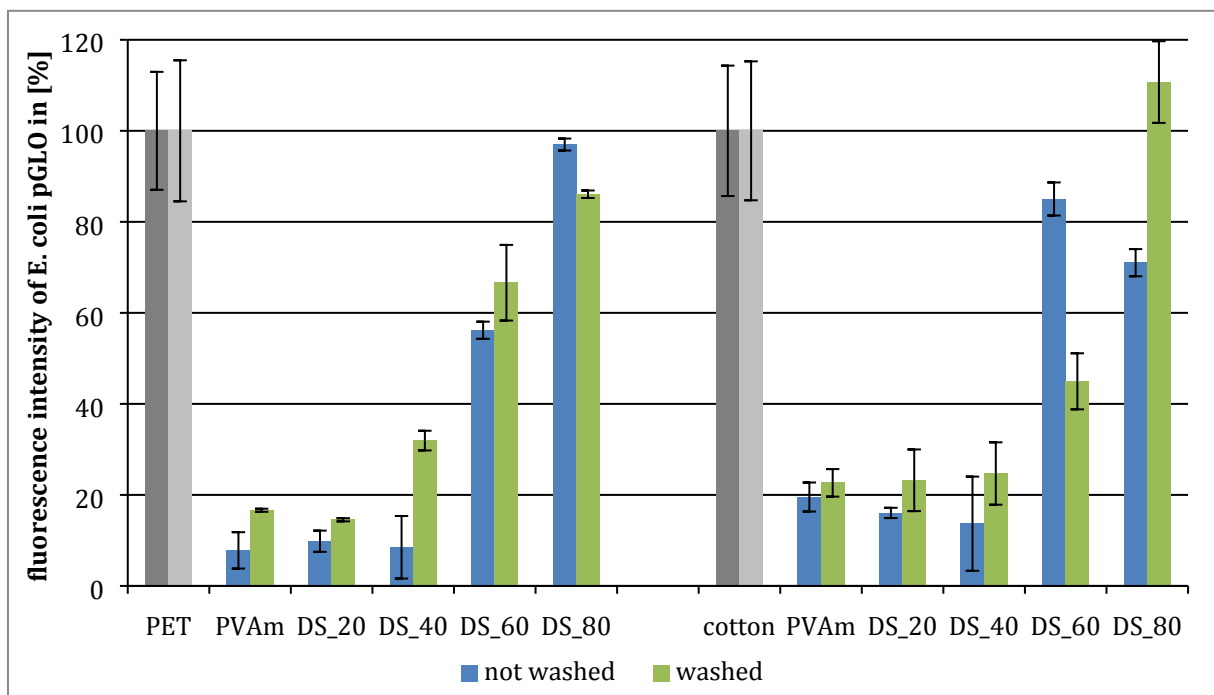

**Figure S17.** Antibacterial activity before and after 5 wash cycles against the gram-negative strain *E. coli* pGLO of different PET and cotton fabrics modified with **PVAm-g-SB2** with different DS.

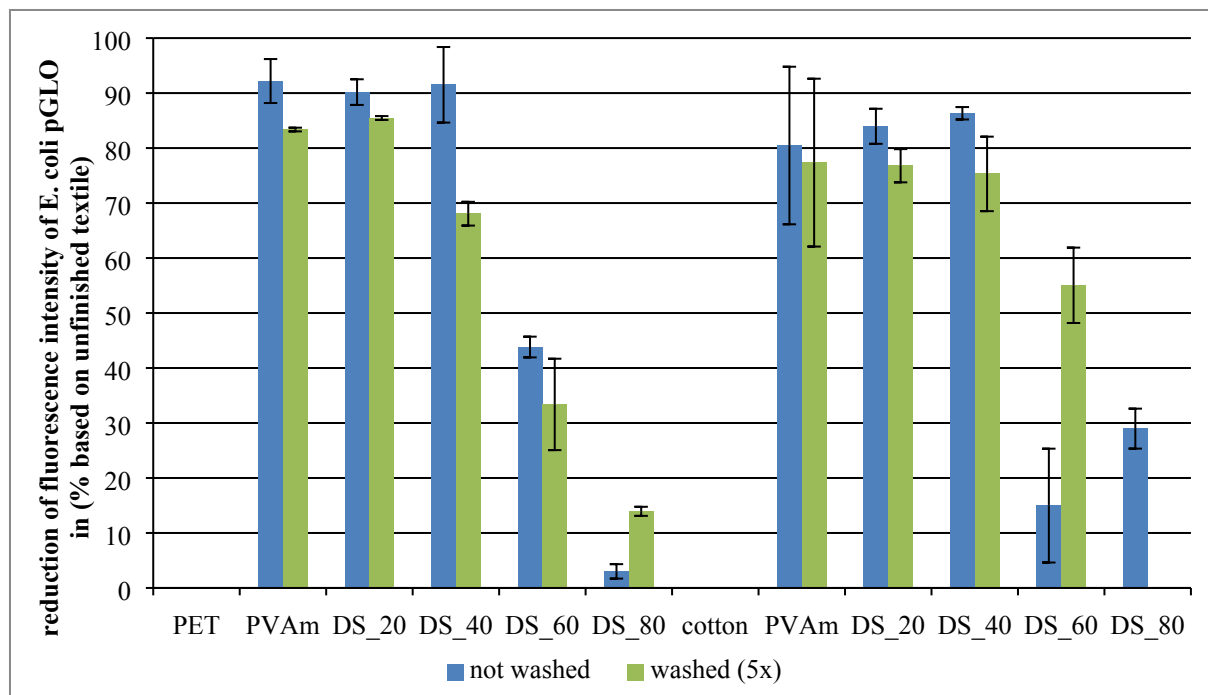

**Figure S18.** Reduction of fluorescence intensity before and after 5 wash cycles against the gram-negative strain *E. coli* pGLO of different PET and cotton fabrics modified with **PVAm-g-SB2** with different DS.
